# Supplementary material for: Electrical contact property and control effects for stable T(H)-TaS2/C3B metal–semiconductor heterojunctions
Source: Royal Society of Chemistry journal article supplement (doi:10.1039/d4cp02283a), 2024-01-01
Supplement: d4cp02283a1.pdf [file d4cp02283a1.pdf]

**Electrical Contact Property and Control Effects for Stable  
T(H)-TaS<sub>2</sub>/C<sub>3</sub>B Metal-Semiconductor Heterojunction**

*Cao Shengguo, Li Zhanhai, Han Jianing, Zhang Zhenhua\**

**Supplementary Information**

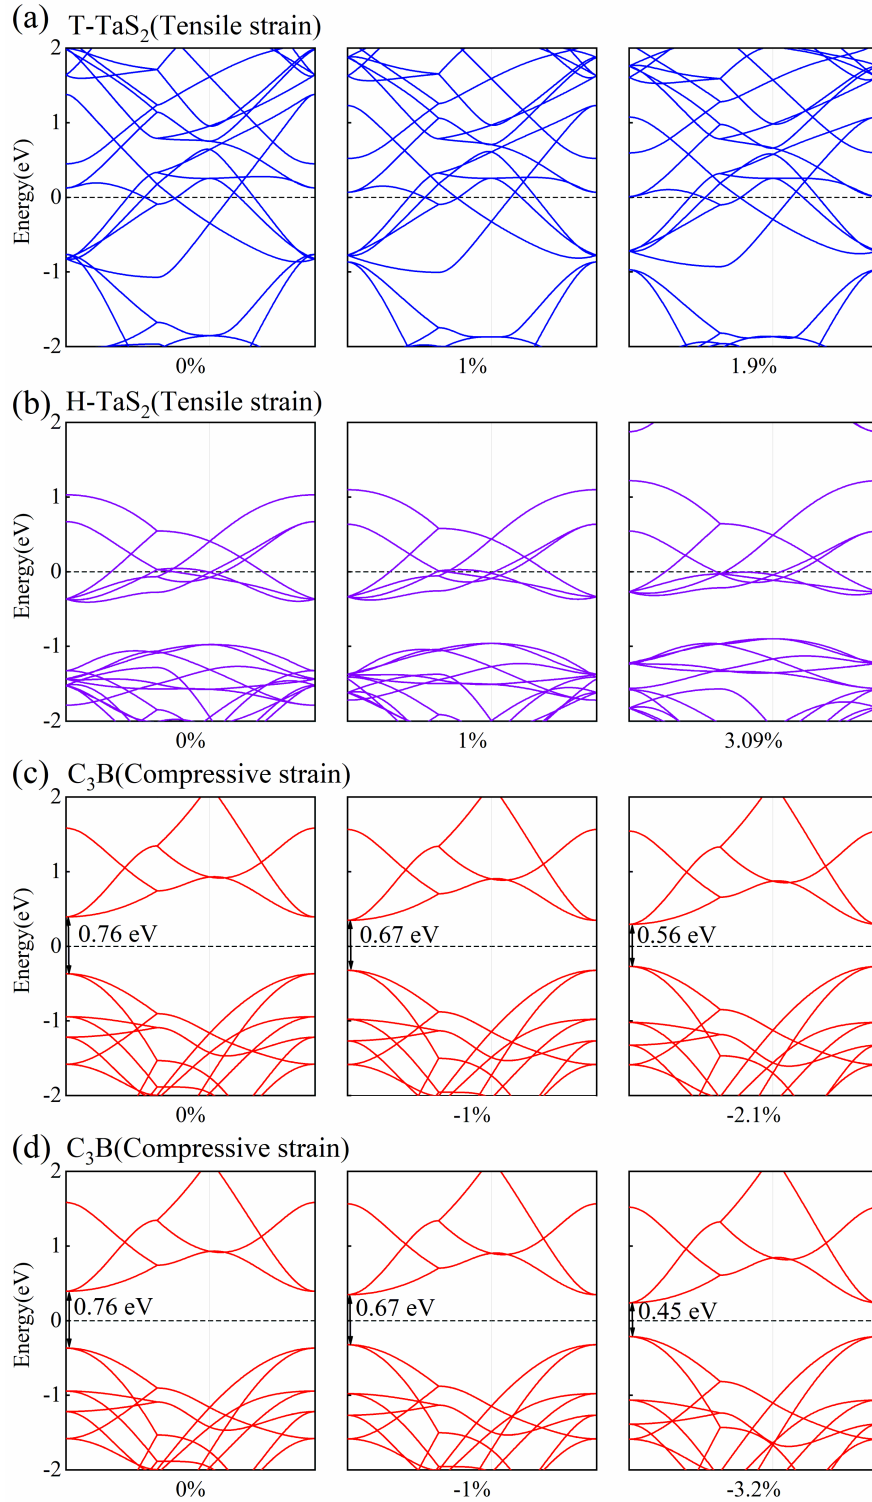

**Fig. S1** (a) and (b) the band structure of T-TaS<sub>2</sub> and H-TaS<sub>2</sub> monolayers under different tensile strains, where the largest tensile strains just correspond to fully match the T(H)-TaS<sub>2</sub> and H-TaS<sub>2</sub> monolayers to the intrinsic C<sub>3</sub>B monolayer, respectively. (c) and (d) the band structure of C<sub>3</sub>B under different compressive strains, where the largest compressive strains just correspond to fully match the C<sub>3</sub>B monolayer to the intrinsic T-TaS<sub>2</sub> and H-TaS<sub>2</sub>, respectively.

**Table S1** Mismatch rate, interlayer distance, and binding energy for various stack configurations.

| Heterojunction                       | Mismatch rate(%) | Stack configuration | Interlayer distances( $\text{\AA}$ ) | Binding energy( $\text{meV}/\text{\AA}^2$ ) |
|--------------------------------------|------------------|---------------------|--------------------------------------|---------------------------------------------|
| T-TaS <sub>2</sub> /C <sub>3</sub> B | 1.90             | A <sub>1</sub>      | 3.32                                 | -45.64                                      |
|                                      |                  | A <sub>2</sub>      | 3.33                                 | -44.89                                      |
|                                      |                  | A <sub>3</sub>      | 3.33                                 | -44.89                                      |
|                                      |                  | A <sub>4</sub>      | 3.34                                 | -44.88                                      |
| H-TaS <sub>2</sub> /C <sub>3</sub> B | 3.09             | B <sub>1</sub>      | 3.33                                 | -43.62                                      |
|                                      |                  | B <sub>2</sub>      | 3.33                                 | -43.62                                      |
|                                      |                  | B <sub>3</sub>      | 3.33                                 | -43.63                                      |
|                                      |                  | B <sub>4</sub>      | 3.33                                 | -43.62                                      |

**Table S2** Tunnel barrier height ( $\Phi_{TB}$ ), half width of the tunneling barrier( $W_{TB}$ ), tunneling probability ( $T_{TB}$ ) and comprehensive factor ( $C$ ) of heterojunctions

|                                      | $W_{TB}(\text{\AA})$ | $\Phi_{TB}(\text{eV})$ | $T_{TB}(\%)$ | $C(\text{eV}\text{\AA}^{-2})$ |
|--------------------------------------|----------------------|------------------------|--------------|-------------------------------|
| T-TaS <sub>2</sub> /C <sub>3</sub> B | 1.28                 | 19.17                  | 2.58%        | 31.40                         |
| H-TaS <sub>2</sub> /C <sub>3</sub> B | 1.22                 | 17.56                  | 3.57%        | 26.14                         |

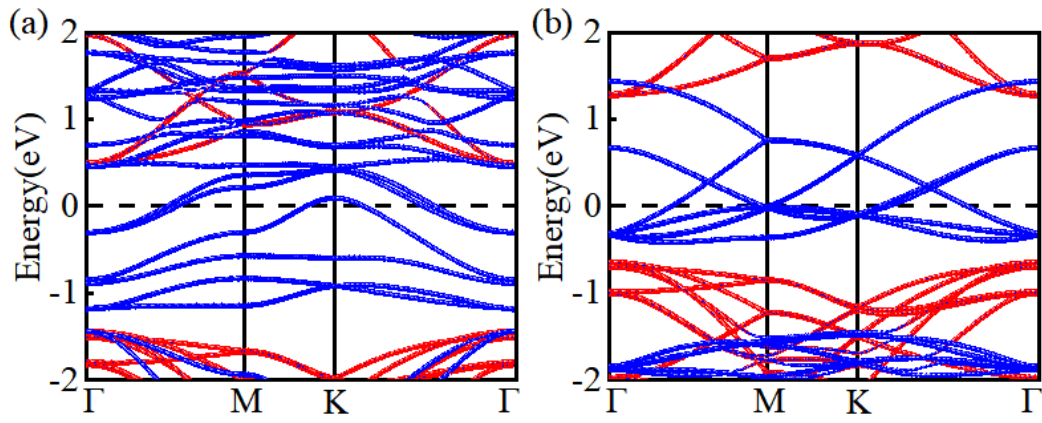

**Fig. S2** Projected band structure for heterojunctions by HSE06 calculations: (a) T-TaS<sub>2</sub>/C<sub>3</sub>B, (b) H-TaS<sub>2</sub>/C<sub>3</sub>B, where red, blue and purple represent the projected band structure of the C<sub>3</sub>B, T-TaS<sub>2</sub>, and H-TaS<sub>2</sub> monolayer, respectively.

---

\* Corresponding author.

E-mail: zhzhang@csust.edu.cn
